# Supplementary material
Source: MDPI journal article supplement (https://www.mdpi.com/2311-5637/7/3/193)
Supplement: s1 [file s1]

Supplementary Table S1: *Parameters of the Airén must after settling (the same must for the six wines)*

| <i>Airén must</i>            |        |
|------------------------------|--------|
| Type of harvest              | Manual |
| Kg. harvested                | 762    |
| ° Baumé                      | 11.62  |
| ° Brix                       | 20.95  |
| Total Acidity (g/L)          | 2.67   |
| pH                           | 4.05   |
| Malic acid (g/L)             | 1.74   |
| NFA (mg/L) (N <sub>2</sub> ) | 179    |
| Must turbidity (NTU)         | 25     |
